# Supplementary material for: Highly active iridium catalysts for the hydrogenation of ketones and aldehydes
Source: Royal Society of Chemistry journal article supplement (doi:10.1039/b815501a), 2009-01-01
Supplement: b815501a.pdf [file b815501a.pdf]

# Highly Active Iridium Catalysts for the Hydrogenation of Ketones and Aldehydes†

Xuanhua Chen, Wenli Jia, Rongwei Guo, Todd W. Graham, Meredith A. Gullons and Kamaluddin Abdur-Rashid\*

## Electronic supplementary information

**Table S1.** Hydrogenation of acetophenone catalyzed by **1**/KO<sup>t</sup>Bu and **2** in methanol at 25 °C. [ketone]<sub>initial</sub> = 1.67M; H<sub>2</sub> = 10 atm.; [catalyst] = 1.8 x 10<sup>-3</sup> M.

---

| entry | time (min) | conv (%)                     |          |
|-------|------------|------------------------------|----------|
|       |            | <b>1</b> /KO <sup>t</sup> Bu | <b>2</b> |
| 1     | 0          | 0                            | 0        |
| 2     | 10         | 23                           | 37       |
| 3     | 20         | 40                           | 61       |
| 4     | 30         | 55                           | 81       |
| 5     | 40         | 75                           | 91       |
| 6     | 50         | 89                           | 96.5     |
| 7     | 60         | 94                           | 97       |
| 8     | 70         | 96                           | 99       |
| 9     | 80         | 98                           | 99       |
| 10    | 90         | 99.5                         | 99.5     |

<sup>a</sup>A weighed amount of the catalyst dissolved in methanol was added to a solution of the substrate in methanol and the mixture was stirred under hydrogen gas. Aliquots of the reaction mixture was withdrawn at various time intervals and analyzed by GC.

---
